# Supplementary material for: Spatial Embedding and Wiring Cost Constrain the Functional Layout of the Cortical Network of Rodents and Primates
Source: PubMed Central journal article supplement (PMC4956175; doi:10.1371/journal.pbio.1002512), 2016-07-21

macaque

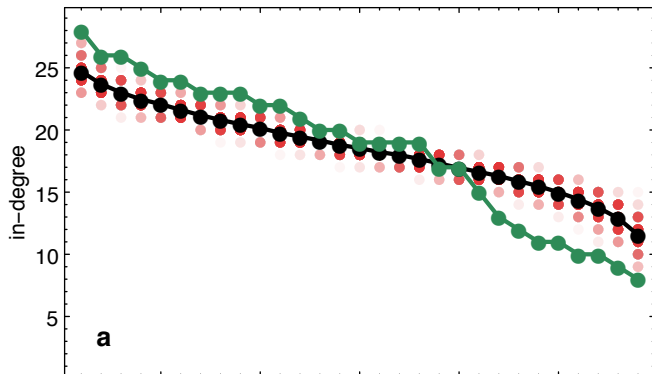

mouse

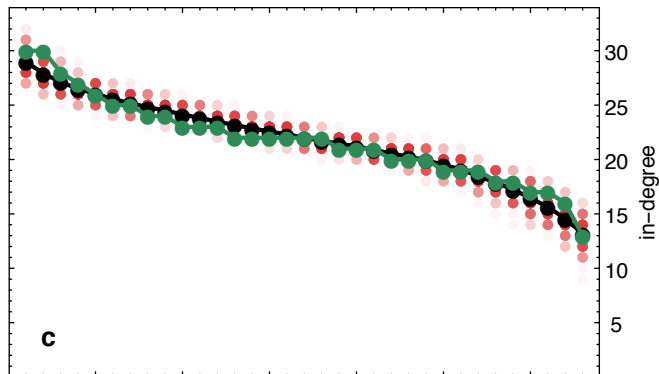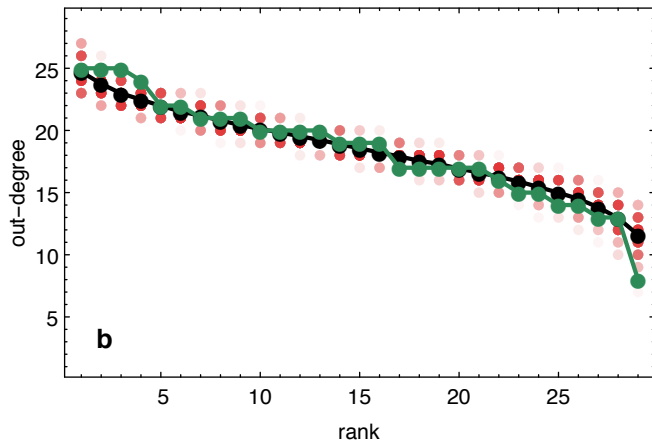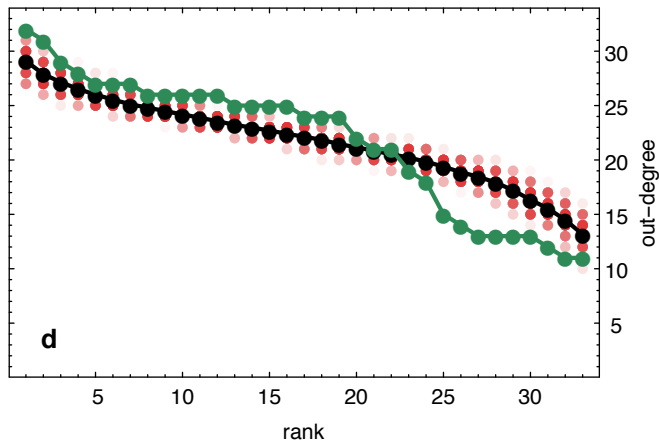

Supplement: pbio.1002512.s004.pdf [file pbio.1002512.s004.pdf]
