# Supplementary material for: Spatial Embedding and Wiring Cost Constrain the Functional Layout of the Cortical Network of Rodents and Primates
Source: PubMed Central journal article supplement (PMC4956175; doi:10.1371/journal.pbio.1002512), 2016-07-21

motifs:  $\ln \frac{\text{data}}{\text{model}}$

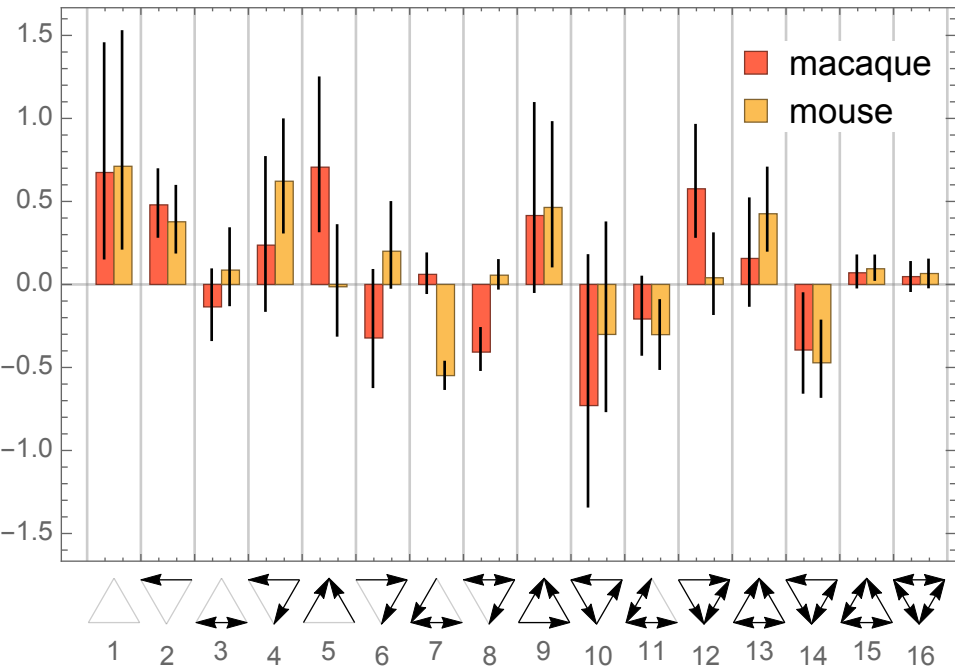

Supplement: pbio.1002512.s005.pdf [file pbio.1002512.s005.pdf]
